# Supplementary material
Source: PubMed Central journal article supplement (PMC3184386)
Supplement: NIHMS317581-supplement-supplement_1.pdf [file NIHMS317581-supplement-supplement_1.pdf]

## **Online Supplementary Data**

### **Materials and methods**

#### **Isolation of Mouse SAN**

To isolate SAN, mice are euthanized with sodium pentobarbital and the heart is quickly excised into Tyrode solution ( $36 \pm 0.5$  °C) consisting of (in mM) 140 NaCl, 5.4 KCl, 1.2 KH<sub>2</sub>PO<sub>4</sub>, 1.0 MgCl<sub>2</sub>, 1.8 CaCl<sub>2</sub>, 5.55 glucose, and 5 HEPES, with pH adjusted to 7.4 with NaOH.

#### **Isolation of Single Mouse SANC**

A strip of tissue containing the SAN region, measuring  $\sim 0.5$  mm  $\times$   $\sim 1$  mm, is restricted by anatomic landmarks and dissected out as described previously [9, 10]. The SAN strips are cut into 3-5 smaller strips and rinsed in a 'low Ca<sup>2+</sup>, low Mg<sup>2+</sup>' solution containing (in mM) 140 NaCl, 5.4 KCl, 1.2 KH<sub>2</sub>PO<sub>4</sub>, 0.2 CaCl<sub>2</sub>, 50 taurine, 18.5 glucose, 5 HEPES and 1 mg/ml bovine serum albumin (BSA), with pH adjusted to 6.9 with NaOH. The rinsed SAN tissue strips are digested in the same 'low Ca<sup>2+</sup>, low Mg<sup>2+</sup>' solution containing collagenase (229 u/ml, type II, Worthington Biochemical Corporation), elastase (1.9 u/ml, Sigma) and protease (0.9 u/ml, type XIV, Sigma) for 15 to 25 min. The tissue is then transferred to KB solution which contains (in mM), 100 potassium glutamate, 10 potassium aspartate, 25 KCl, 10 KH<sub>2</sub>PO<sub>4</sub>, 2 MgSO<sub>4</sub>, 20 taurine, 5 creatine, 0.5 EGTA, 20 glucose and 5 HEPES, with pH adjusted to 7.4 with KOH). Single SANC are released by mechanically agitating the digested tissue strip, by gentle pipetting of tissue strips. SANC are identified under light microscopy by their spindle shape and small size with centered single nuclei (e.g., Figures 2, 4).

### **List of antibodies used in this study**

The following antibodies are used: anti-HCN4 (hyperpolarization-activated cyclic nucleotide-gated channel 4, 1:100, Alomone, Israel); anti total phospholamban (PLB, 1:200, Badrilla, Leeds, UK), anti-phosphorylated phospholamban (SER16) (PLB-PS16, 1:200, Badrilla, Leeds, UK); anti-NCX1 (1:200, clone R3F1; Swant, Bellinzona, Switzerland); anti-RyR2 antibody (1:200, clone C3-33; Affinity BioReagents, Golden, CO), anti-SERCA2 antibodies (1:500, clone IID8 and Clone 2A7-A1; Affinity BioReagents, Golden, CO), anti-Caveolin-3 (Cav-3, 1:200, BD Biosciences, NJ), anti-Calsequestrin (CSQ, 1:200, Cat#: ab3516, Abcam, MA). The specificity of each antibody has been tested elsewhere [17]. Two secondary antibodies, Alexa Fluor 488 donkey anti-rabbit IgG and Rhodamine red donkey anti-mouse IgG (1:200 dilution; Molecular Probes) are employed to detect various primary antibodies.

### **Immunolabeling of SAN tissue section and single SANC**

Immunocytochemistry was carried out on isolated cells and tissue sections. Cells were plated onto laminin-treated slides and allowed to settle for 30 min. Tissue sections were cut perpendicular to the Crista Terminalis using a cryostat. Cells and sections were fixed in 4 % paraformaldehyde (Sigma) for 10 min, washed three times with phosphate buffer solution (PBS) over 30 min, permeabilized by 0.1% Triton X-100 (Sigma) for 30 min, washed three times with PBS over 30 min, and blocked with 1% bovine serum albumin (BSA; Sigma) and 4% normal Goat serum (invitrogen, USA) in PBS for 1–2 h before application of primary antibody. Primary antibodies were diluted in 1% BSA and 4% normal goat serum in PBS. Cells and sections were incubated with primary antibody (at an appropriate concentration) at 4°C overnight, briefly washed in PBS and then Alexa Fluo-488 goat anti-rabbit or Alexa Fluo-561

goat anti-mouse secondary antibodies (1: 200 dilution, Invitrogen, USA) were applied. Cells and sections were washed three times with PBS and then mounted with Vectashield (H-1000; Vector Laboratories, USA) and coverslips were sealed with nail polish. In control experiments on isolated cells and tissue sections, no primary antibody was used and no labelling was detected.

### **Confocal imaging of local subsarcolemmal $\text{Ca}^{2+}$ releases in single permeabilized SANC**

Intact mouse SANC are plated on laminin-coated (20  $\mu\text{g}/\text{ml}$ ) in 35 mm #zero glass bottom petri dishes (MatTek Cultureware) for 20 minute to attach. After superfusion with normal Tyrode solution (with 1.8 mM  $\text{Ca}^{2+}$ ), only spontaneously beating SANC are selected and then permeabilized with saponin (0.01 % for 2 min) in an “internal” solution containing (in mM): K aspartate, 100; KCl, 25; NaCl, 10; MgATP, 3;  $\text{MgCl}_2$ , 0.81 (free  $[\text{Mg}^{2+}] \sim 1$  mM); HEPES, 20; EGTA, 0.5; phosphocreatine, 10 and creatine phosphokinase, 5U/ml; pH 7.2. After carefully washing out saponin, the permeabilized solution is changed to a continuous superfusion with a recording experimental solution, as above, but with added 30  $\mu\text{M}$  fluo-4 pentapotassium salt (Molecular Probes, Eugene, OR) and 100 nM free  $[\text{Ca}^{2+}]$ . The total  $\text{Ca}^{2+}$  concentration required to generate a free  $[\text{Ca}^{2+}]$  is calculated using a computer program (WinMAXC 2.50, Stanford University, CA). The temperature is maintained at  $35 \pm 0.5^\circ\text{C}$  by the lens heater and pre-heater (TC2BIP 2/3Ch Bipolar Temp controller from Cell MicroControls).

### **$\text{Ca}^{2+}$ signals recording in skinned cells**

Spontaneous local  $\text{Ca}^{2+}$  releases (LCR) in skinned cells are recorded as previously described.¶ Briefly, all  $\text{Ca}^{2+}$  signals are recorded in skinned cells loaded with the  $\text{Ca}^{2+}$  indicator, Fluo-4 salt, by line-scanning confocal microscopy (Carl Zeiss, with a

ZEISS Plan-NEOFLUAR 63x/1.40 oil objective, Inc., Germany) an argon laser at 488-nm excited and the fluorescence signal is collected at wavelengths of >515 nm in line scan mode oriented along the cell periphery.

### **Image analysis**

Ca<sup>2+</sup> images are analyzed as previously described.<sup>1,2</sup> Briefly, Fluo-4 salt of Ca<sup>2+</sup> signals were presented as F/F<sub>0</sub> (normalized Ca<sup>2+</sup> signal) or as a absolute free Ca<sup>2+</sup> concentration ([Ca<sup>2+</sup>]<sub>i</sub>) change (ΔCa<sup>2+</sup>, nmol/L). [Ca<sup>2+</sup>]<sub>i</sub> values in cells are evaluated from respective F/F<sub>0</sub> values using a previously described formulation:<sup>2</sup> [Ca<sup>2+</sup>]<sub>i</sub>=K<sub>d</sub>·(F/F<sub>0</sub>)/(K<sub>d</sub>/[Ca<sup>2+</sup>]<sub>r</sub>+1-F/F<sub>0</sub>), where [Ca<sup>2+</sup>]<sub>r</sub> is [Ca<sup>2+</sup>]<sub>i</sub> at rest (no Ca<sup>2+</sup> releases) that was set to 100 nM in our permeabilized cells. K<sub>d</sub> (1 μmol/L) is the dissociation constant for Ca<sup>2+</sup>-bound fluo-4. Images are analyzed by custom-made (Victor A. Maltsev) imaging software based on Delphi-7 developing software and with IDL software (5.4, Research Systems, Boulder, CO). Power spectra and autocorrelation functions of Ca<sup>2+</sup> signals are calculated by a Clamp Fit program (version 9.2). LCR spatial size was indexed as the full width at the half maximum amplitude (FWHM), and its duration characterized as the full duration at half maximum amplitude (FDHM). The individual LCR signal mass (SM) was measured as follows: SM= FWHM×FDHM×1/2ΔF/F<sub>0</sub> (where ΔF/F<sub>0</sub>=F/F<sub>0</sub>-1). The total integrated LCR signal mass is calculated as the sum of signal masses of individual LCRs. For the IBMX study, a crude index of the relative numbers of activated RyRs within an LCR for a given cell is calculated as total integrated LCR signal mass divided on the smallest individual LCR signal mass (SM) before the drug application. In addition LCR number and total integrated LCR signal mass of each cell are normalized per 100 μm of the linescan image size during a one-second time interval.

## Drugs

The following drugs are applied in this study: Isoproterenol (ISO, 1  $\mu$ M, cat#420355, Calbiochem), atropine (10 $\mu$ M cat#A0132, Sigma Aldrich), propranolol (2.5  $\mu$ M, cat# P0884 Sigma Aldrich), a specific protein kinase A inhibitor 14-22 Amide, myristoylated (PKI, 15  $\mu$ M, cat#4476485, Calbiochem (skinned cell experiments)), variable concentrations of H89 (N-[2-((p-Bromocinnamyl)amino)ethyl]-5-isoquinolinesulfonamide, 2HCl, cat#371963, Calbiochem), Cyclopiazonic acid (CPA, 5  $\mu$ M, cat#C1530, Sigma), 3'-isobutylmethylxanthine (IBMX, 100  $\mu$ M, 5  $\mu$ M (for skinned cell experiments) cat#15879, Sigma), MDL, an AC inhibitor 12330A (100  $\mu$ M, cat# M128, Sigma), various concentrations of ryanodine (cat#559276, Calbiochem, CA USA), and 20 mM Caffeine (cat#C0750, Sigma), and EGTA (10 mM, 0.5 mM cat#E0396, Sigma)

## ON-LINE SUPPLEMENT Figures

**Online Supplement Figure 1:** Voltage- and time-dependent gating properties of an ensemble of mutually interacting surface membrane ion channels governs the rate and rhythm of spontaneous action potential (AP) firing of the heart's pacemaker cells by controlling spontaneous membrane depolarization between APs. Because this ensemble of electrogenic membrane proteins can, *in silico*, generate rhythmic APs, it can be envisioned as a surface membrane "clock" (M clock). In the context of the APs that it produces, the M clock regulates cell  $\text{Ca}^{2+}$  balance in a given steady state via  $\text{Ca}^{2+}$  influx through L-type  $\text{Ca}^{2+}$  channels and  $\text{Ca}^{2+}$  efflux through the  $\text{Na}^+ / \text{Ca}^{2+}$  exchanger (NCX). The electrogenic and regulatory molecules on the surface membrane of sinoatrial nodal cells are strongly modulated by  $\text{Ca}^{2+}$  and phosphorylation. Phosphorylation-dependent intracellular  $\text{Ca}^{2+}$  cycling is also an integral player in controlling pacemaker cell automaticity.<sup>2</sup> Spontaneous, localized, and critically timed local subsarcolemmal  $\text{Ca}^{2+}$  releases generated by the sarcoplasmic reticulum (SR) via ryanodine receptors (RyRs) occur during late diastolic depolarization. The SR has been referred to as an intracellular " $\text{Ca}^{2+}$  clock" because the submembrane  $\text{Ca}^{2+}$  oscillations that it generates are periodic, occur when surface membrane function is experimentally eliminated, and also exist *in silico*. However, in nature, neither the M clock nor the  $\text{Ca}^{2+}$  clock exists in isolation of each other.  $\text{Ca}^{2+}$  and phosphorylation-dependent coupling of the functions of molecules composing the

subsystem M and  $\text{Ca}^{2+}$  clocks creates a complex, robust, coupled-clock pacemaker system that ensures stable rhythmic firing of cardiac pacemaker cells.

**Online Supplement Figure 2:**  $\text{Ca}^{2+}$  cycling proteins are expressed in SAN regions. SAN center, peripheral and atrial myocytes in CT are immunolabeled with both HCN4 and RyR2, NCX1 or SERCA2 antibody. In all three regions, RyR2, NCX1 and SERCA2 are abundantly expressed.

**Online Supplement Figure 3:** Single isolated ventricular myocyte and SANC are labeled with CSQ antibody. Two different patterns of sub-cellular distribution are found in these two types of cells. CSQ shows uniform distribution throughout the ventricular myocyte, while a dominant sub-membrane distribution pattern is seen in SANC. Scale = 20  $\mu\text{M}$ .

**Online Supplement Figure 4:** A. Average dose-response of spontaneous SANC beating rate to ryanodine or H89. B. Representative examples of the effects of H89 or MDL on SANC beating rate.

**Online Supplement Figure 5:** Confocal image of a single SANC double labeled with total PLB (red) and PS-16 PLB (green). Note the PS-16 PLN shows a sub-sarcolemmal enriched pattern (white arrows) in these cells. This enriched pattern is further revealed in the pseudo-color image in the right panels.

**Online Supplement Figure 6:** Confocal images of isolated ventricular myocytes immuno-labeled with PLB-PS16 (green) and PLN total (red) in (A) untreated (basal),  $\beta$ -adrenergic stimulation (ISO, 1  $\mu\text{M}$ ), PKA inhibition (PKI, 15  $\mu\text{M}$  or H89?CONC), (B) PDE inhibition (IBMX, 100  $\mu\text{M}$ ) and (C) AC inhibition (MDL, 100  $\mu\text{M}$ ). Scale = 20  $\mu\text{m}$ .

**Online Supplement Figure 7:** The effect of Isoproterenol to augment the SANC beating rate is blunted in the presence of CPA or ryanodine.

### Online Supplement References

1. Bogdanov KY, Vinogradova TM, Lakatta EG. Sinoatrial nodal cell ryanodine receptor and  $\text{Na}^{+}$ - $\text{Ca}^{2+}$  exchanger: molecular partners in pacemaker regulation. *Circ Res* 2001;88:1254-8.
2. Cheng H, Lederer WJ, Cannell MB. Calcium sparks: elementary events underlying excitation-contraction coupling in heart muscle. *Science* 1993;262:740-4.
